# Supplementary material
Source: Springer Nature journal article supplement (https://www.springermedizin.de/resource/supplementary/12889_2010_2008_MOESM2_ESM.pdf/9487310)
Supplement: MOESM2 [file 9487310]

Mothers given a study information package by the Maternal Child health nurse at the initial home visit or the 2-week visit. Mothers asked if they would provide their details and be contacted by researchers to receive further study information

## Recruitment

Agree

Refuse

Research team contact mother with further information about the study

non-participant short survey completed

### Visit 1 (child 1 month old):

- Consent
- Survey
- Child clinical assessment
- Carer & child saliva sample

### Visit 2 (child 6 months old):

- Survey
- Primary carer oral health assessment
- Child oral health assessment
- Carer & child saliva sample

### Visit 3 (child 12 months old):

- Survey
- Child clinical assessment
- Carer & child saliva sample

### Visit 4 (child 18 months old):

- Survey
- Child clinical assessment
- Carer & child saliva sample

## Data Collection
